# Supplementary material for: Synthesis of polyamides using palladium-on-carbon (Pd/C) as a heterogeneous, reusable and ligand-free catalytic system
Source: Royal Society of Chemistry journal article supplement (doi:10.1039/c5ra20426g), 2015-01-01

## Supporting Information

### Synthesis of polyamides using palladium-on-carbon (Pd/C) as a heterogeneous, reusable and ligand-free catalytic system

Anilkumar Satapathy,<sup>ab</sup> Sandip T. Gadge,<sup>a</sup> Takehiko Sasaki<sup>c</sup> and Bhalchandra M. Bhanage<sup>a\*</sup>

<sup>a</sup> Department of Chemistry, Institute of Chemical Technology, N. Parekh Marg, Matunga, Mumbai-400019, India. E-mail: [bm.bhanage@gmail.com](mailto:bm.bhanage@gmail.com); [bm.bhanage@ictmumbai.edu.in](mailto:bm.bhanage@ictmumbai.edu.in); Fax: +91 22 22692102; Tel: +91 22 33612601

<sup>b</sup> Reliance Industries limited, Patalganga, Rasayani, Raigad, Maharashtra 410 220 India.

<sup>c</sup> Department of Complexity Science and Engineering, Graduate School of Frontier Sciences, The University of Tokyo, 5-1-5, Kashiwanoha, Kashiwa, Chiba 277-8561, Japan.

## List of Contents

FT-IR, <sup>1</sup>H, and <sup>13</sup>C NMR Spectra of Products: 2-13

## Copies of FT-IR, $^1\text{H}$ and $^{13}\text{C}$ NMR Spectra:

### (3a) FT-IR

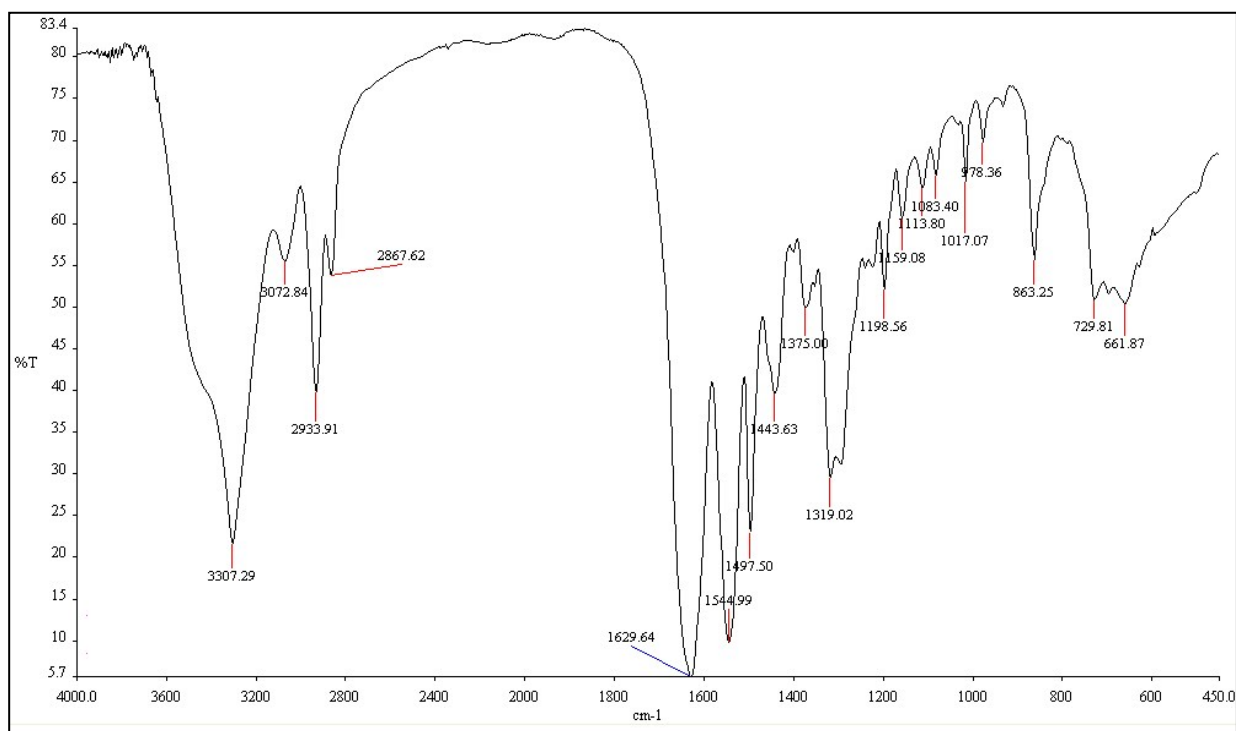

### (3a) $^1\text{H}$ NMR

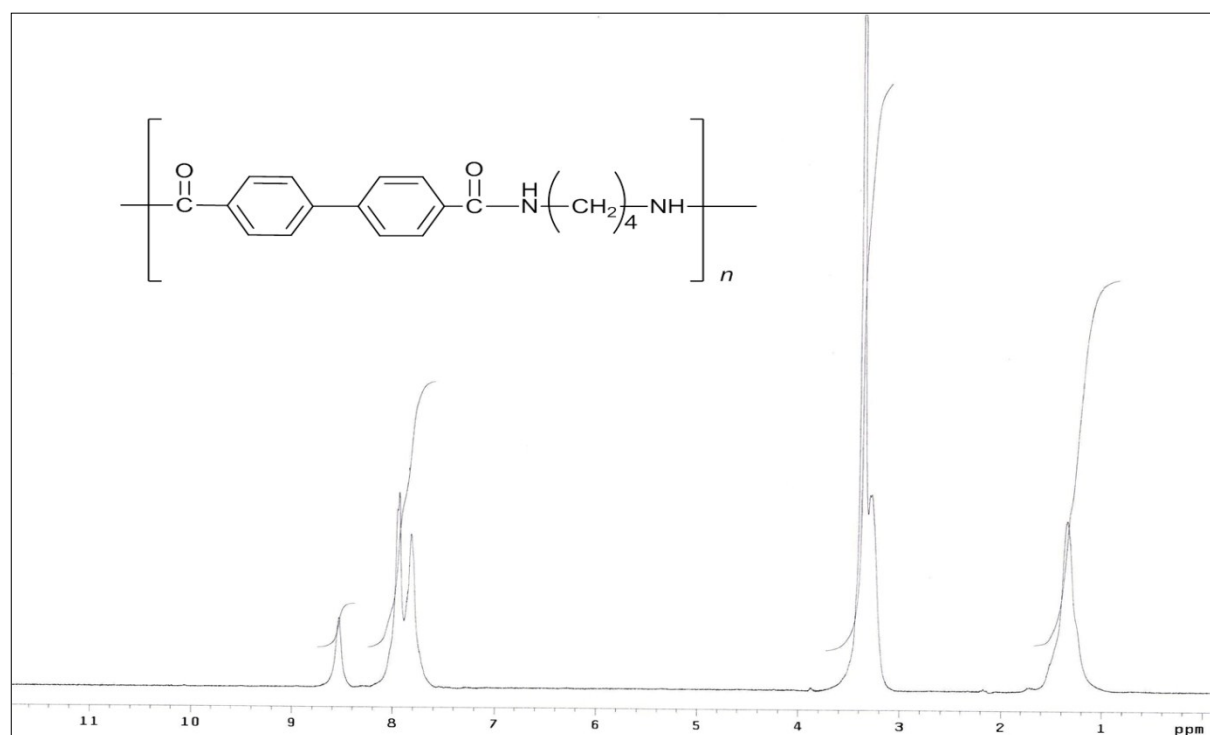

### (3a) <sup>13</sup>C NMR

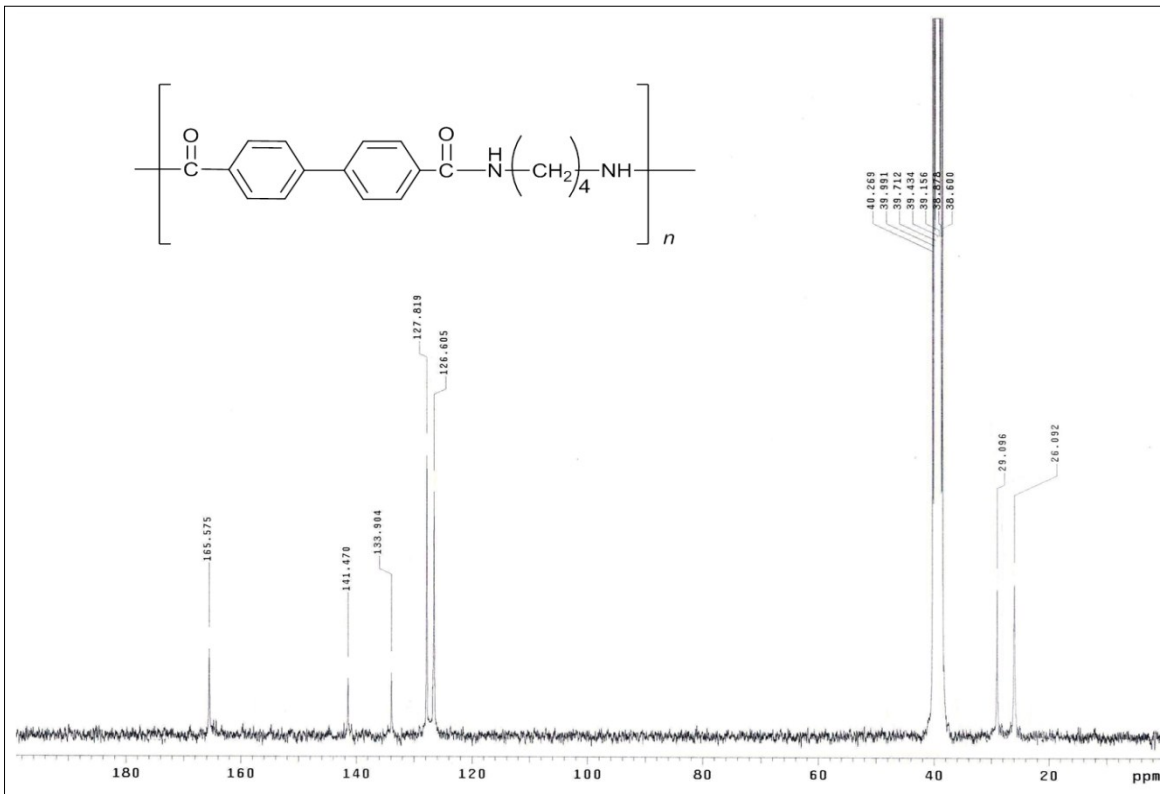

### (3b) FT-IR

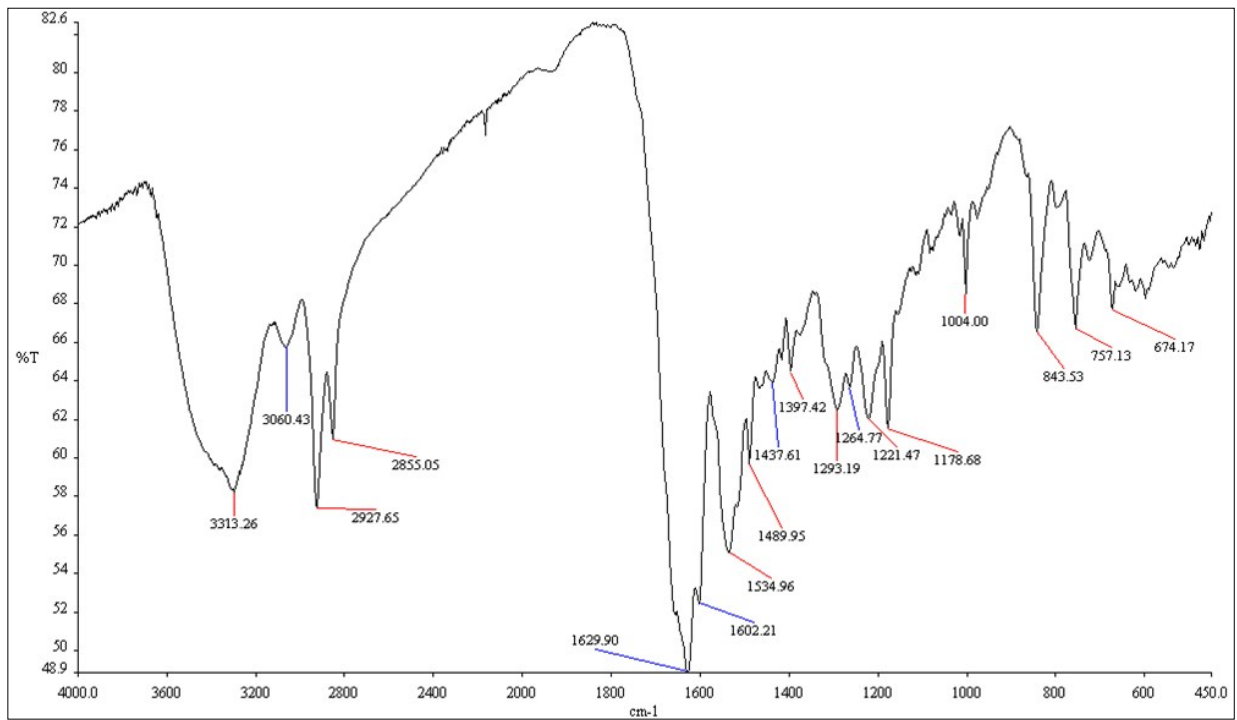

**(3b) <sup>1</sup>H NMR**

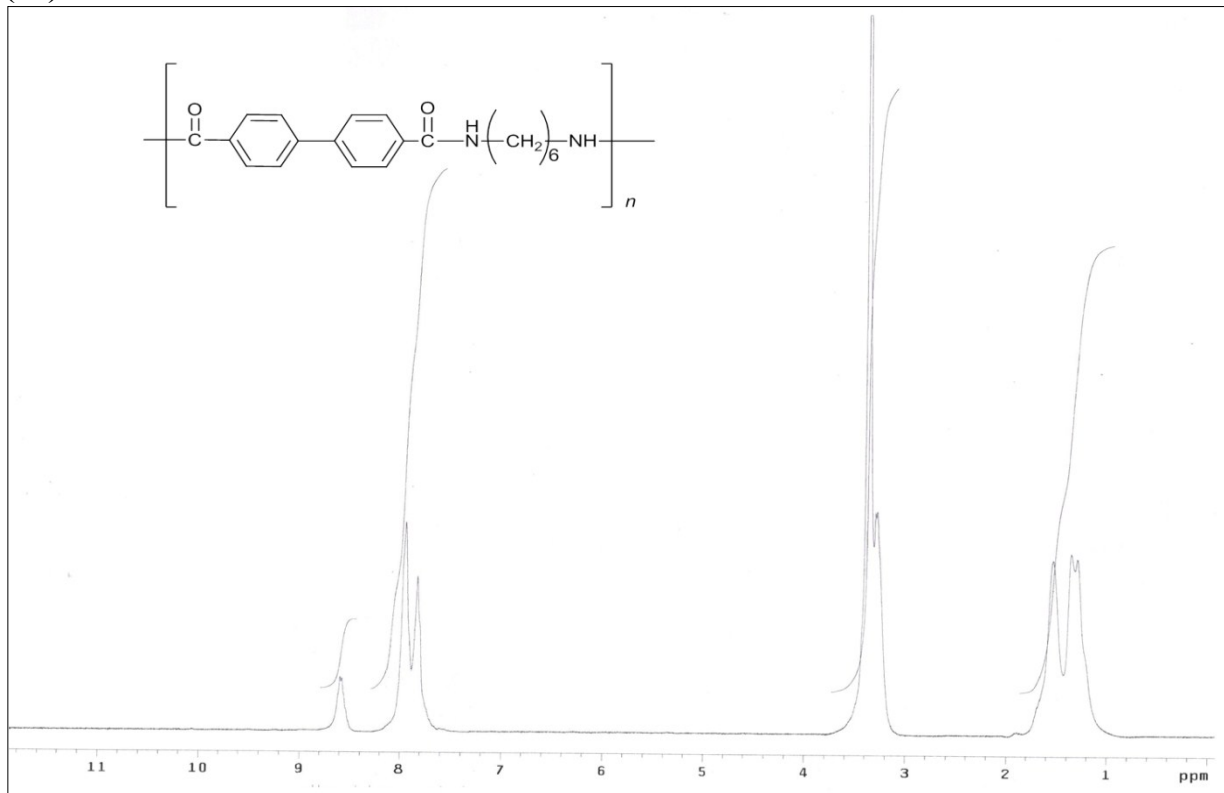

**(3b) <sup>13</sup>C NMR**

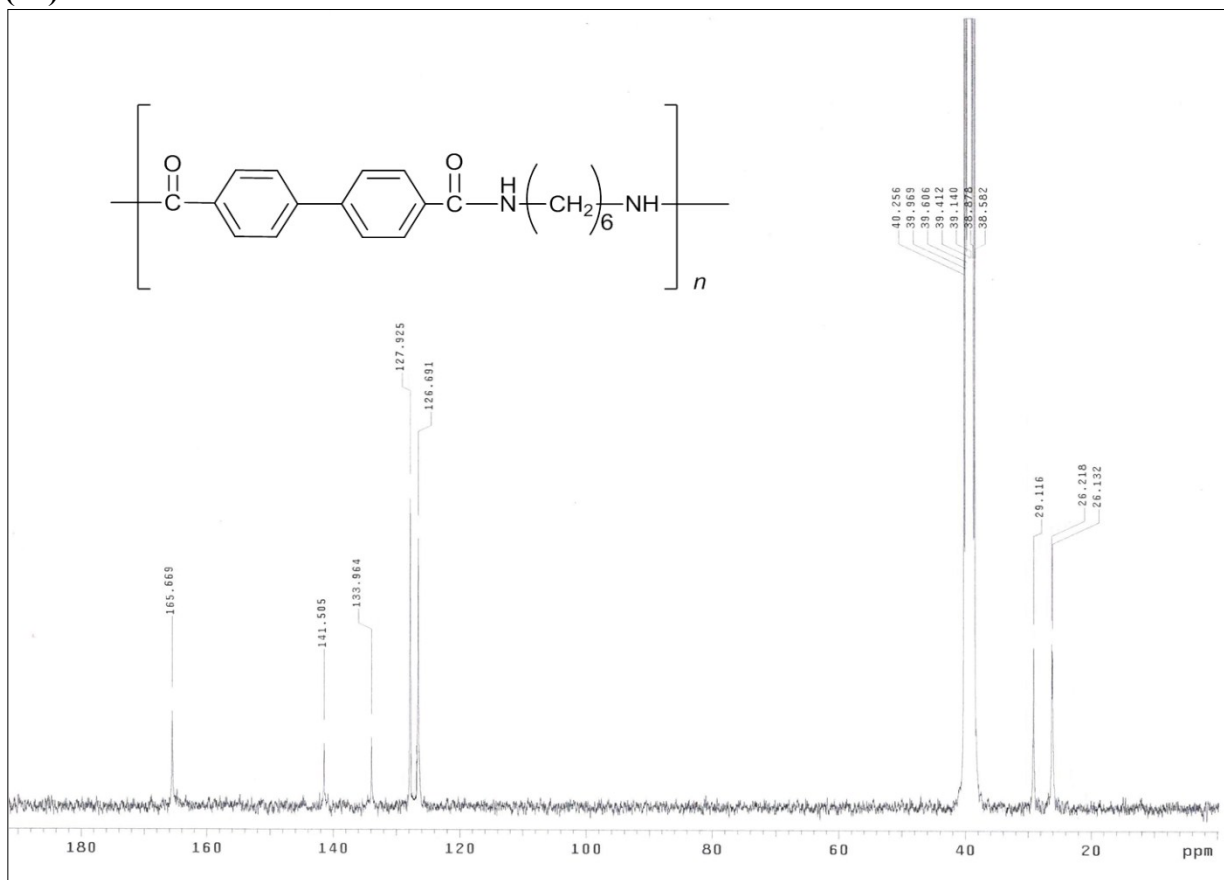

### (3c) FT-IR

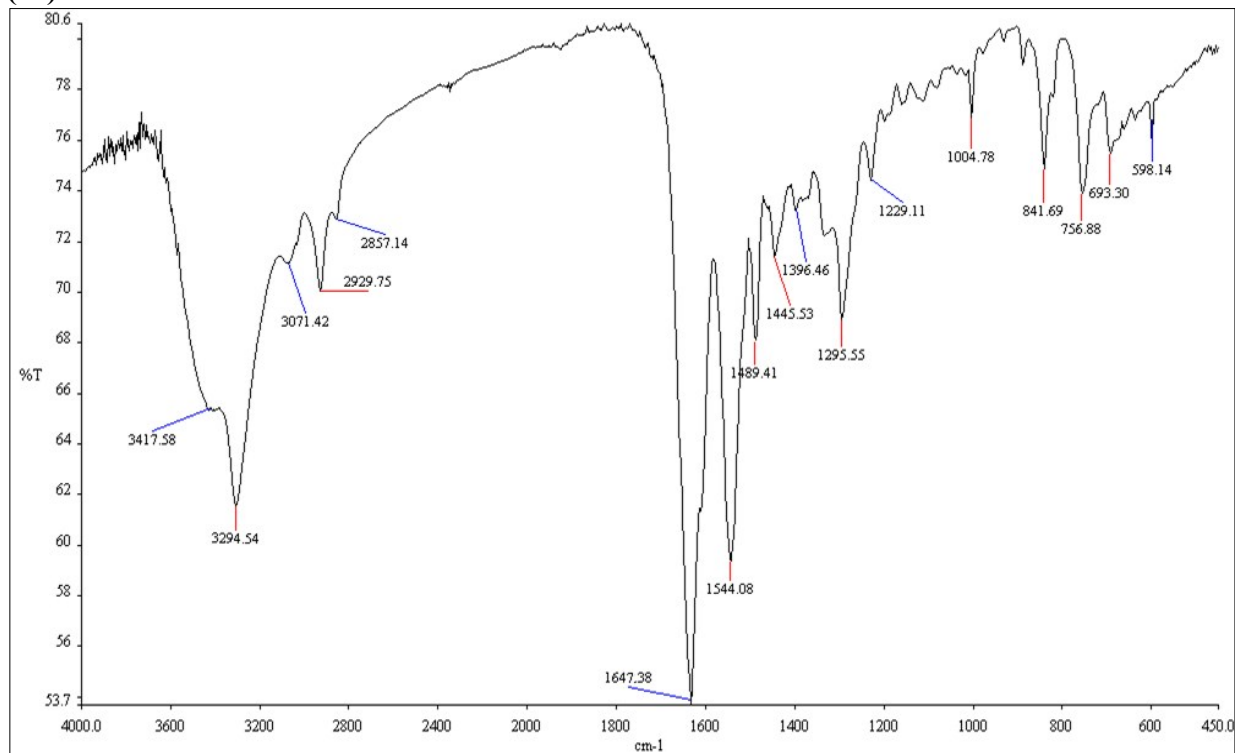

### (3c) <sup>1</sup>H NMR

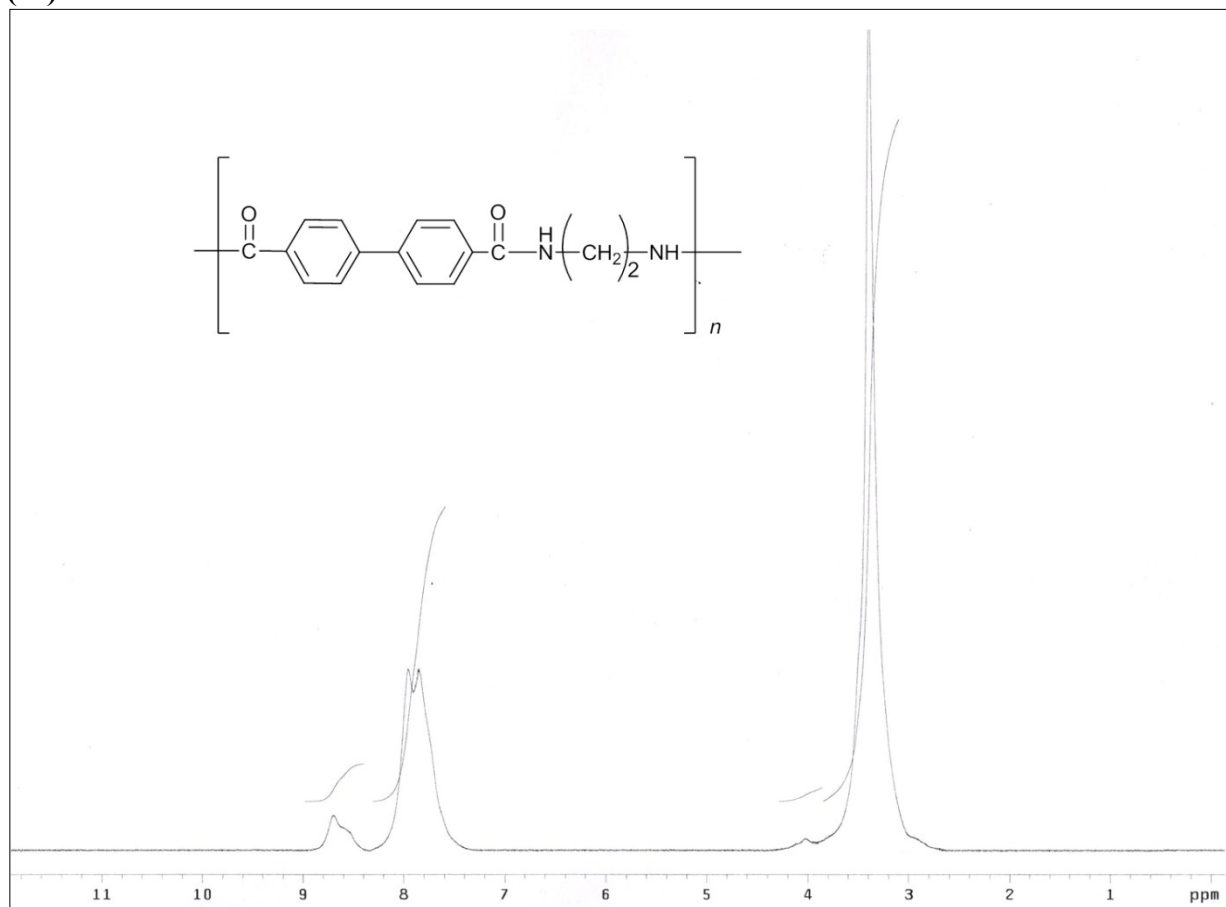

### (3c) <sup>13</sup>C NMR

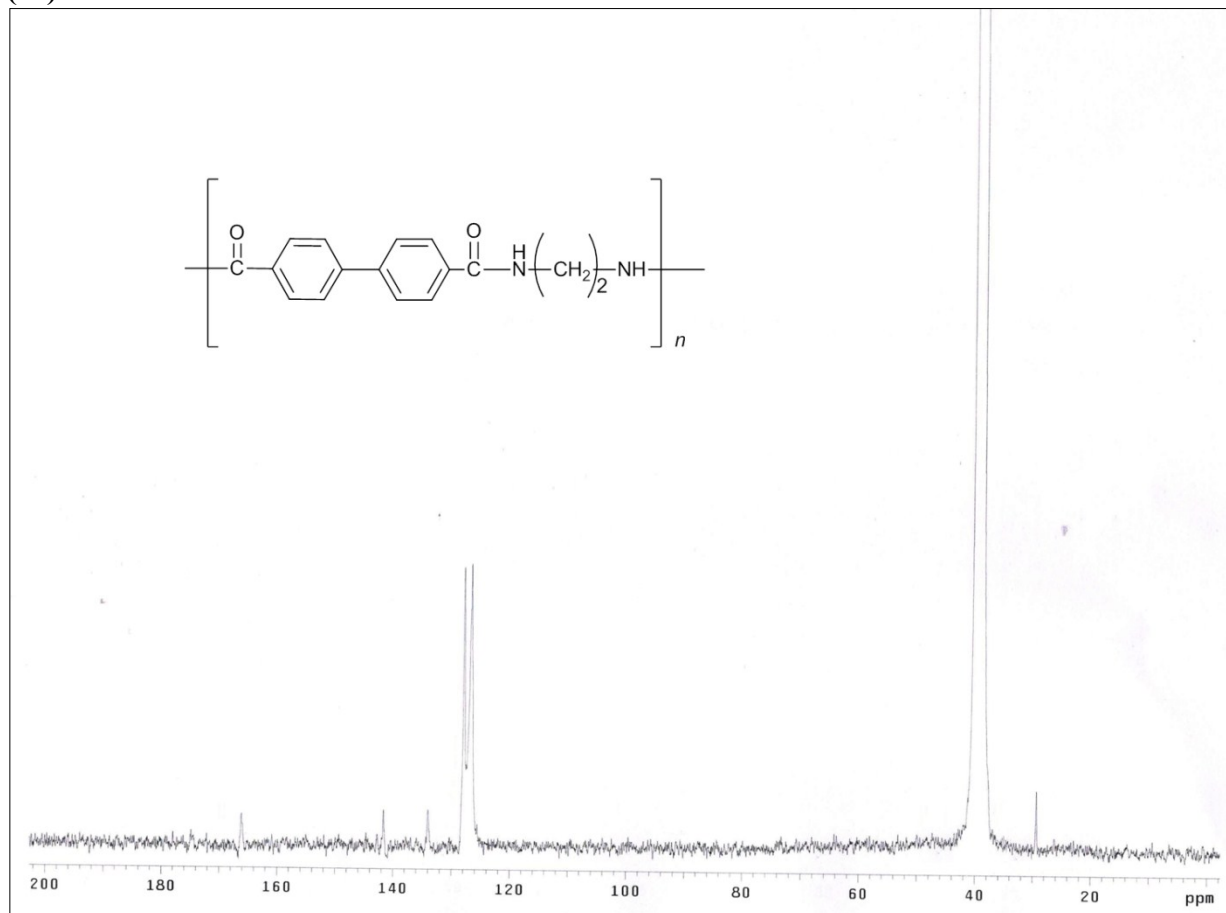

### (3d) FT-IR

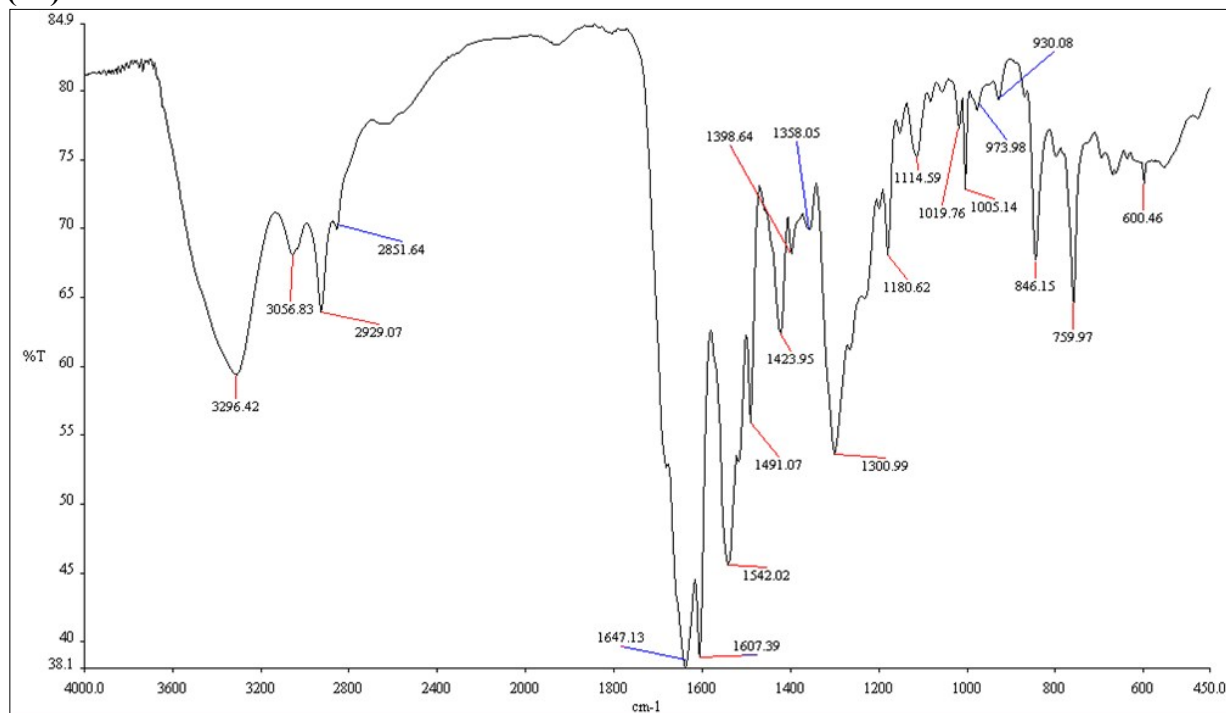

### (3d) $^1\text{H}$ NMR

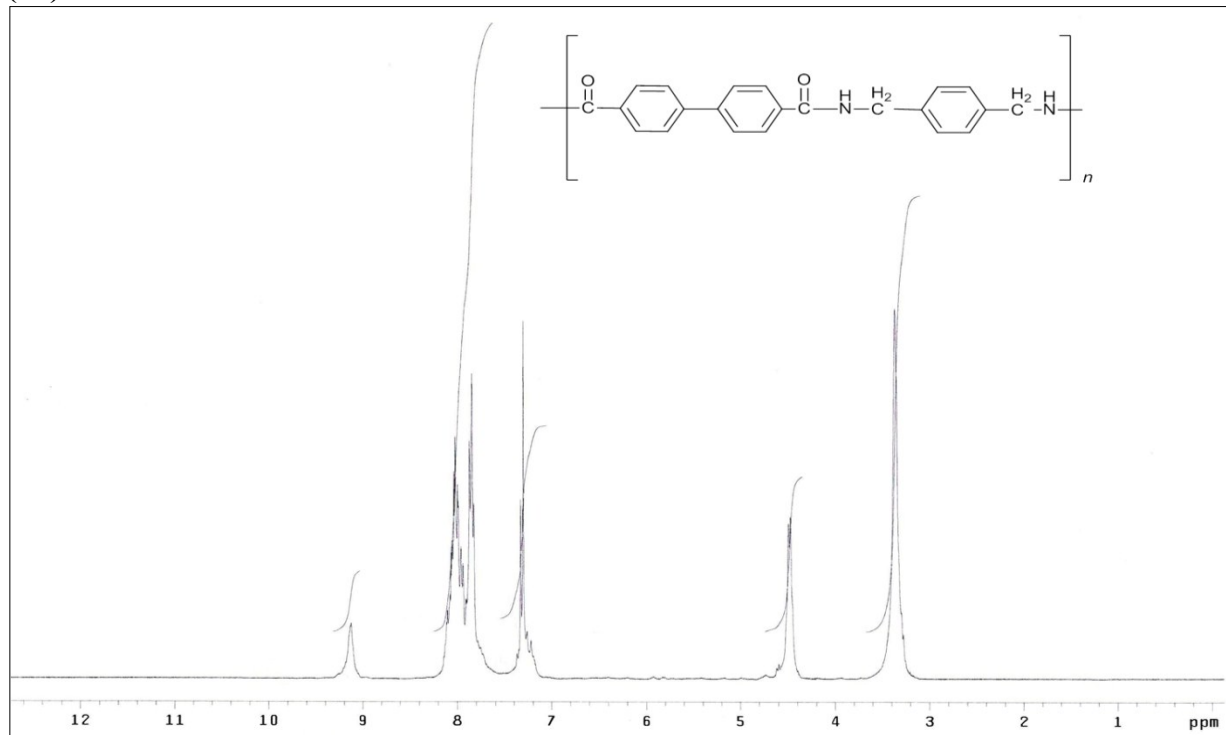

### (3d) $^{13}\text{C}$ NMR

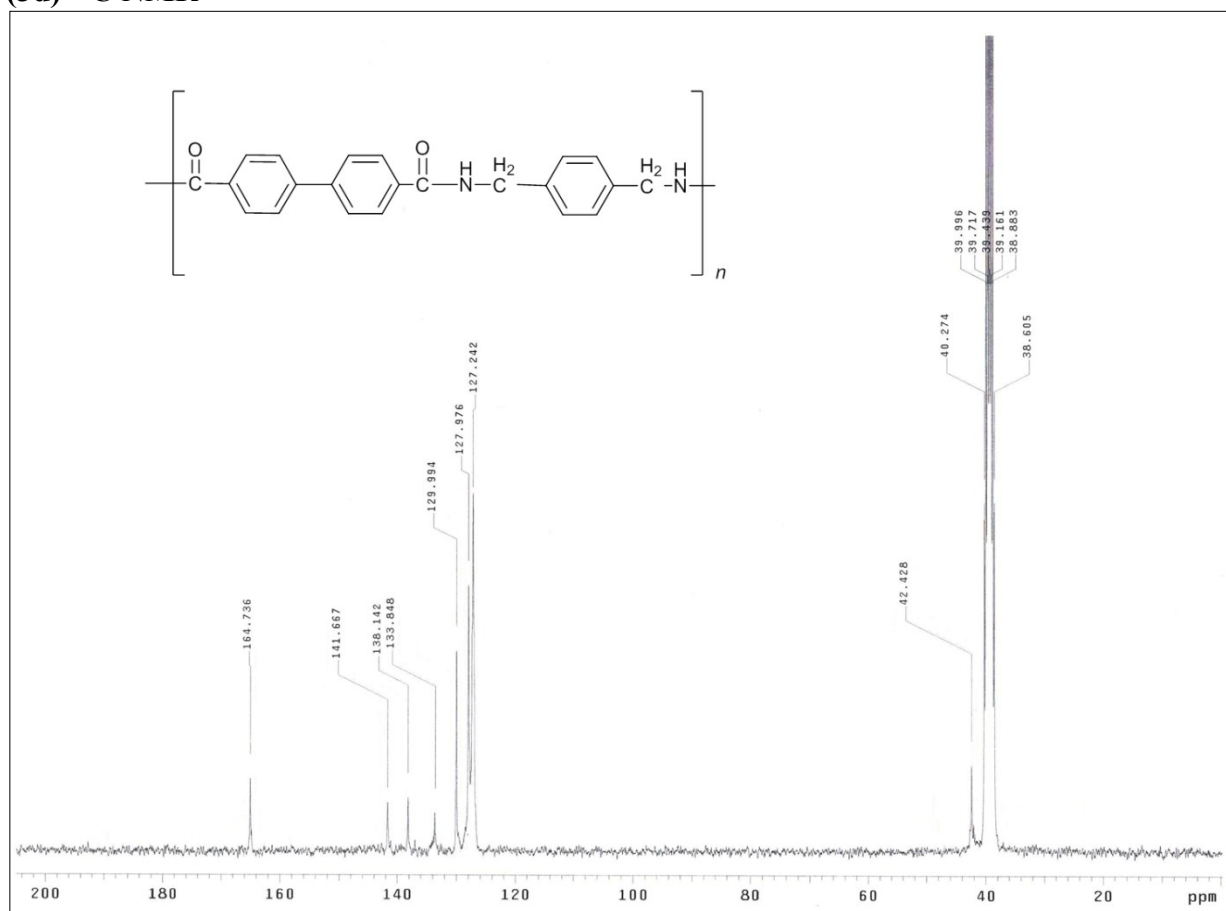

### (3e) FT-IR

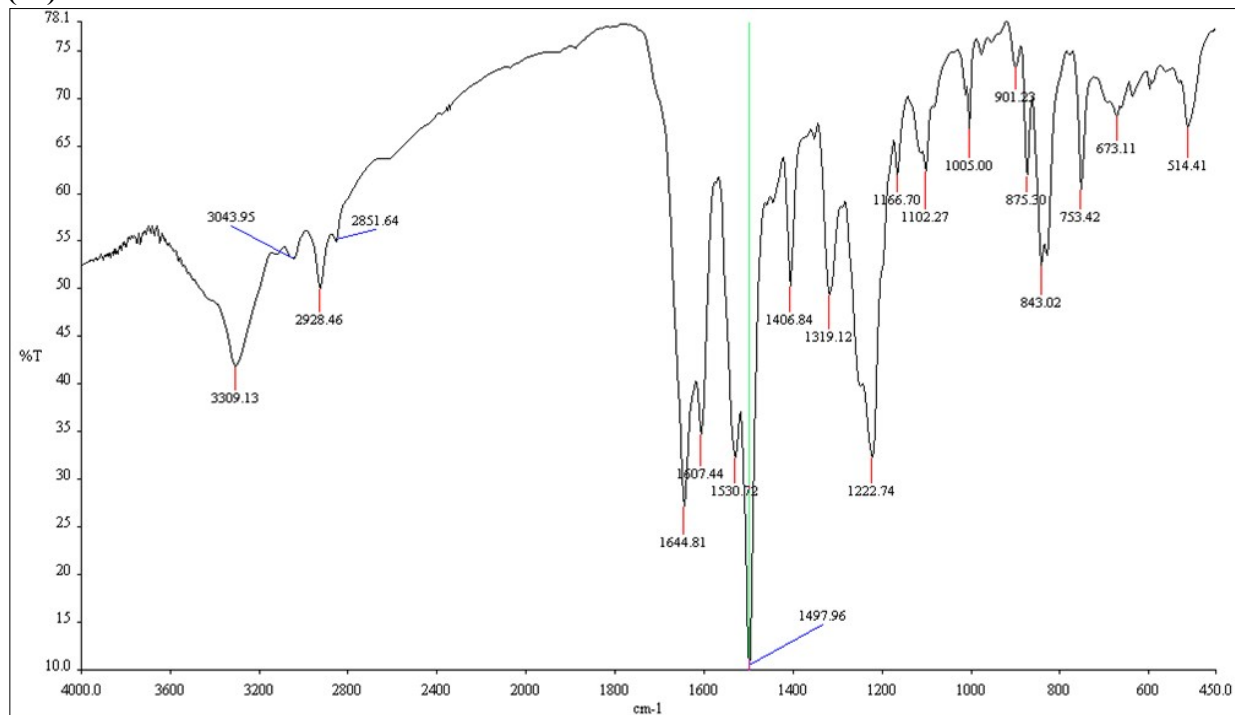

### (3e) <sup>1</sup>H NMR

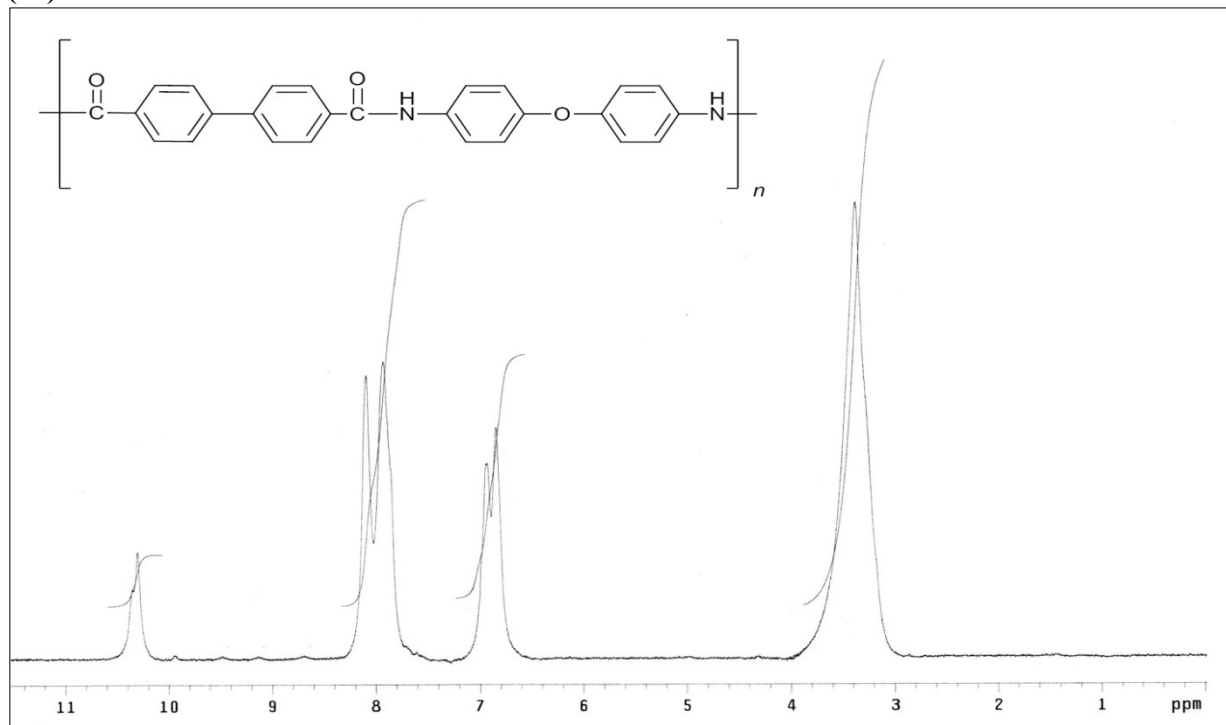



**(3e) <sup>13</sup>C NMR**

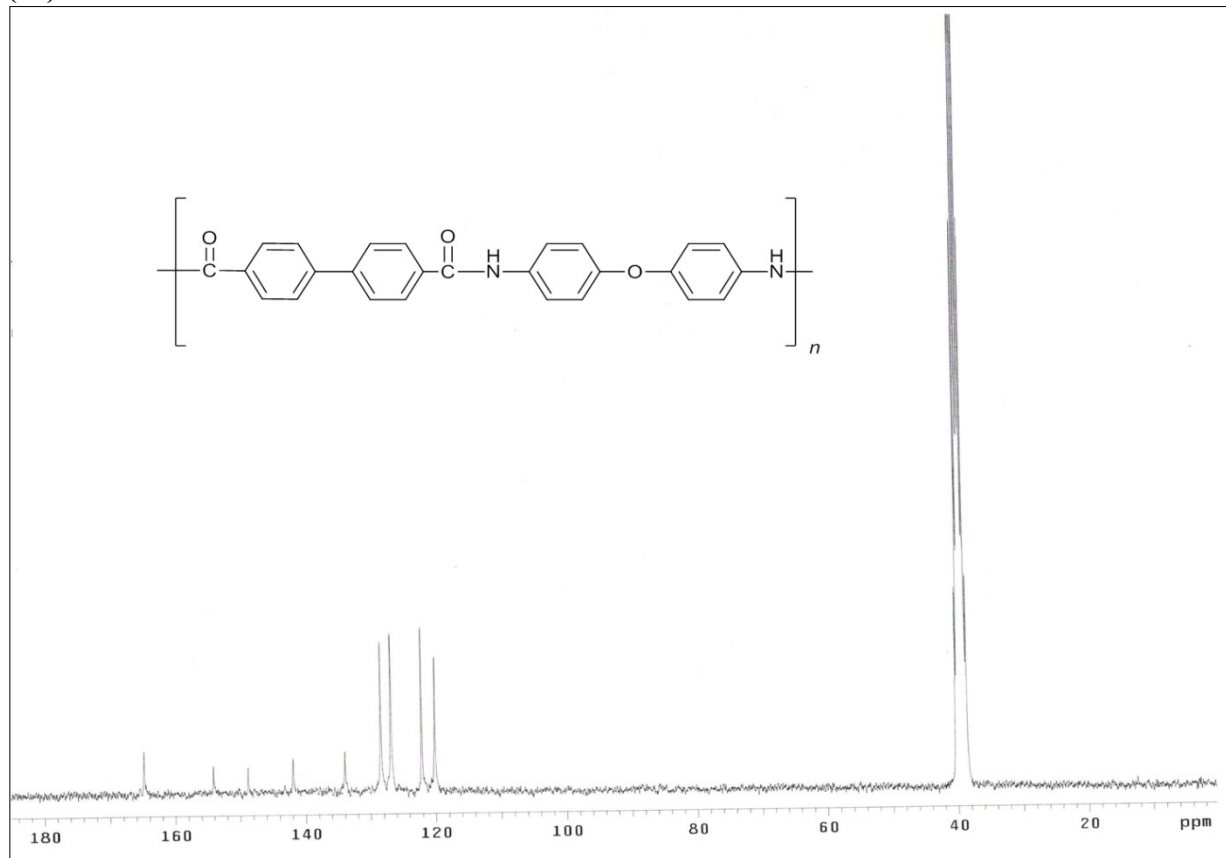

**(3f) FT-IR**

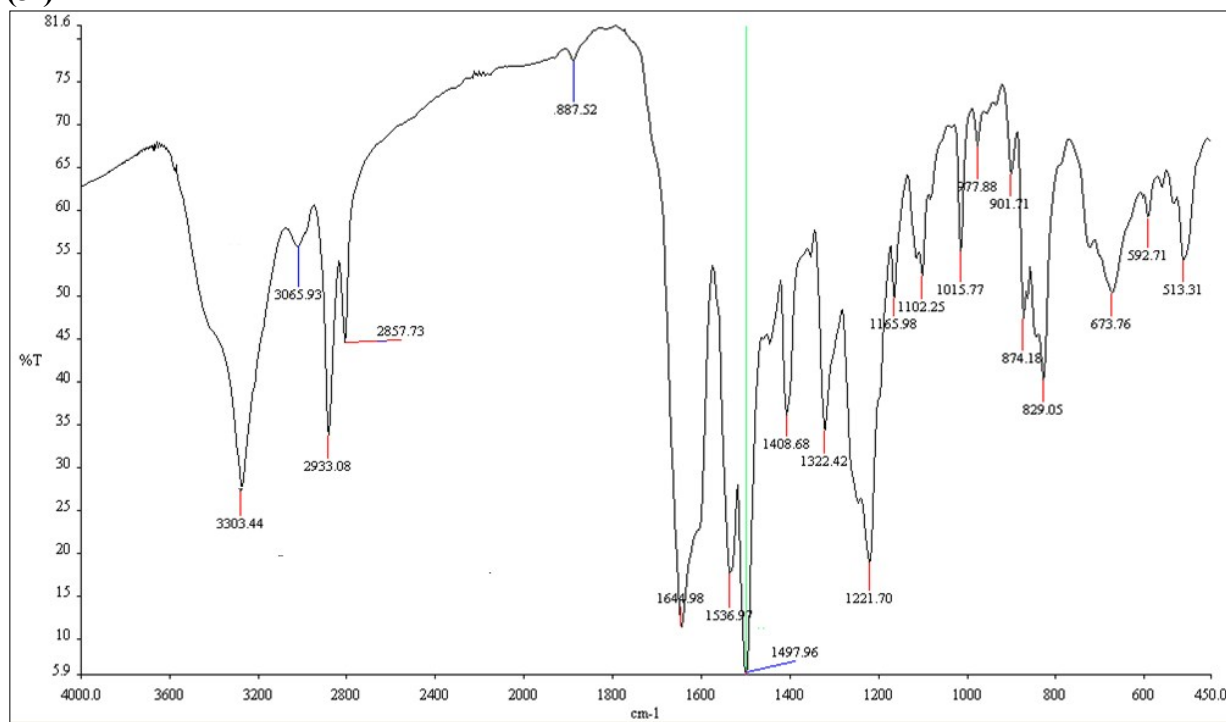

**(3f)  $^1\text{H}$  NMR**

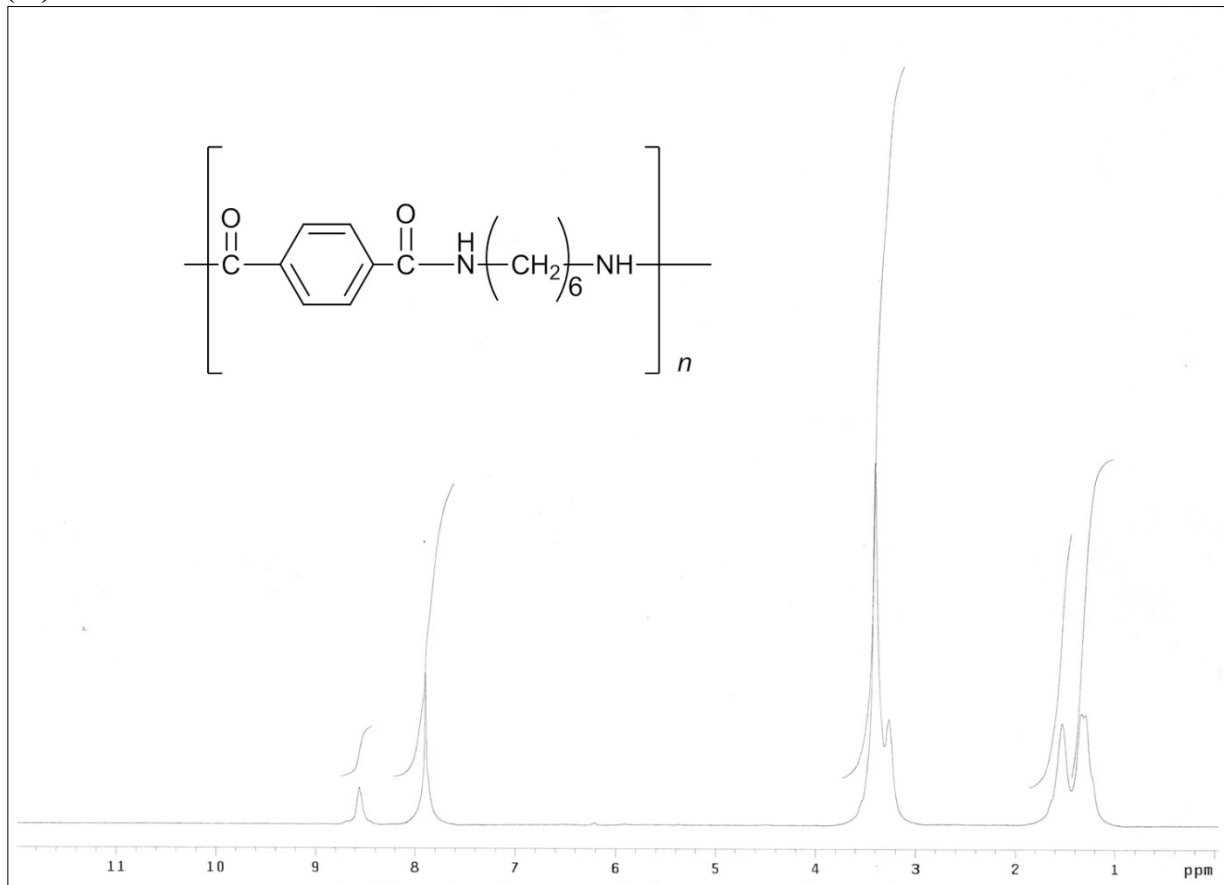

**(3f)  $^{13}\text{C}$  NMR**

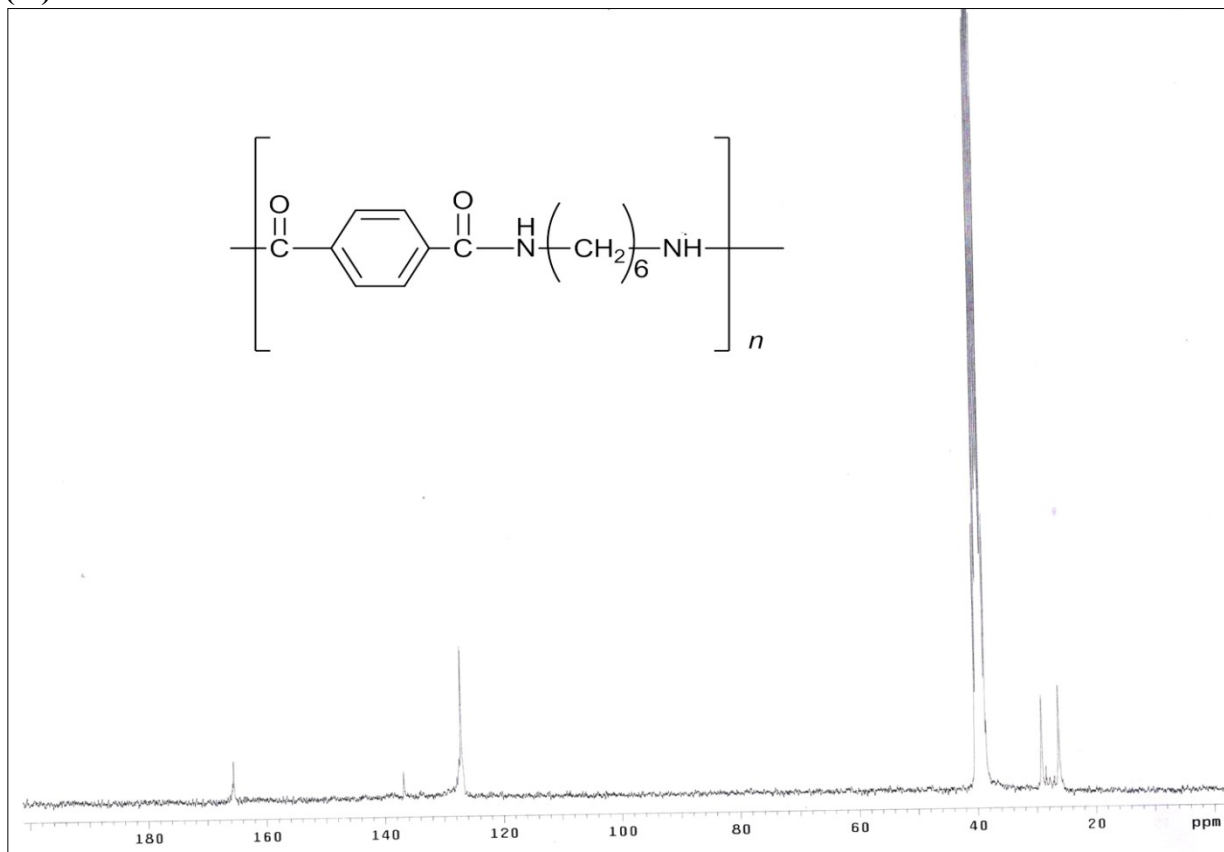

### (3g) FT-IR

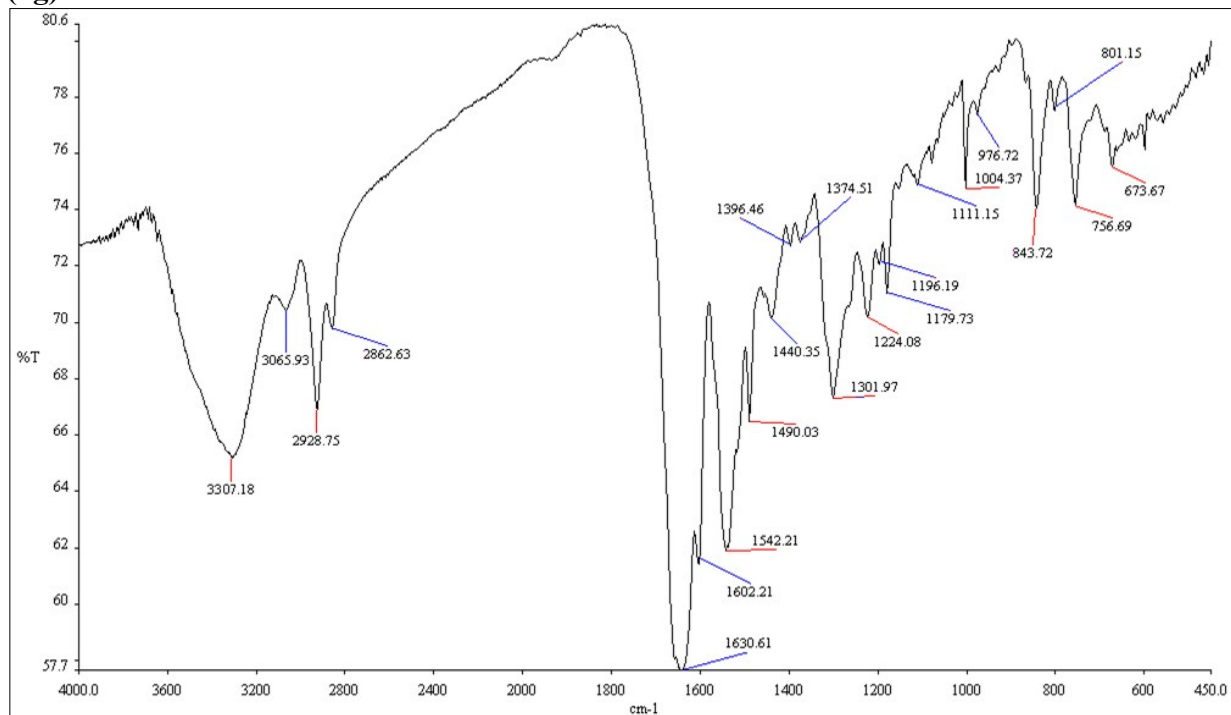

### (3g) <sup>1</sup>H NMR

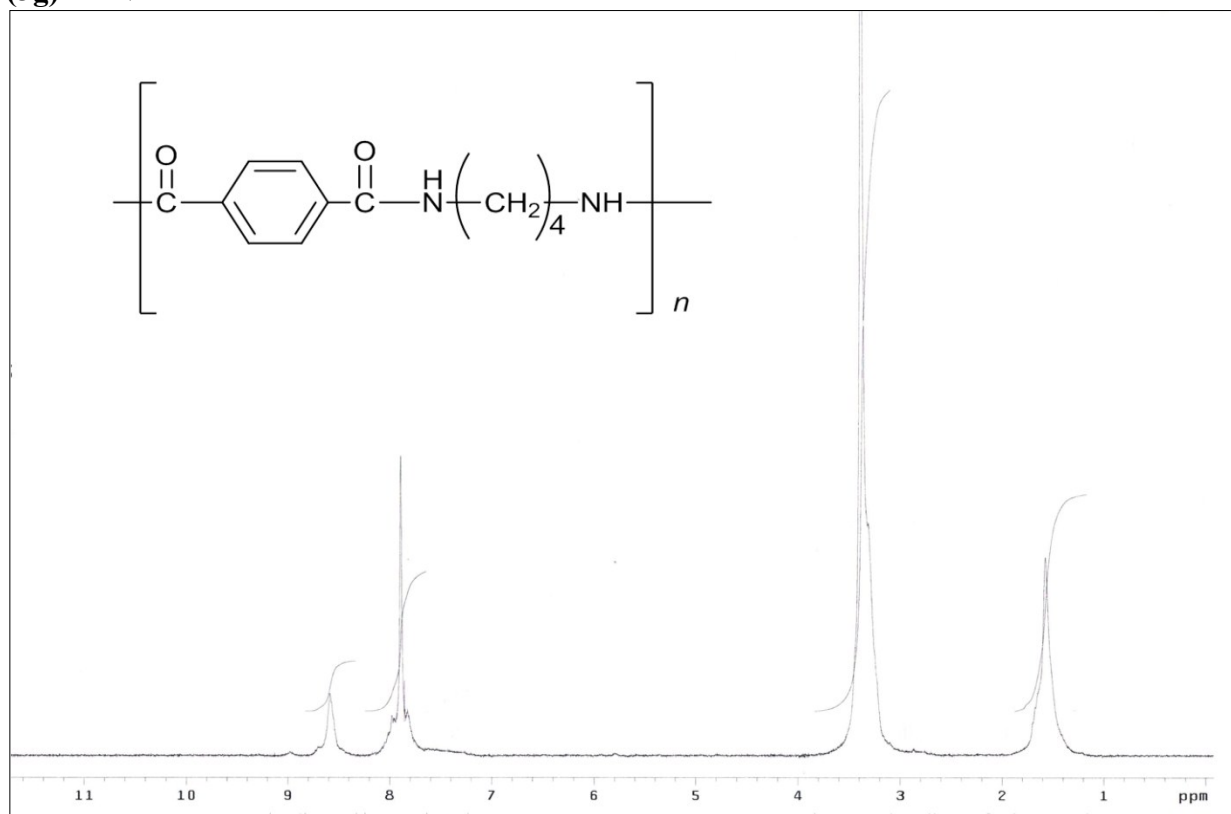

### (3g) <sup>13</sup>C NMR

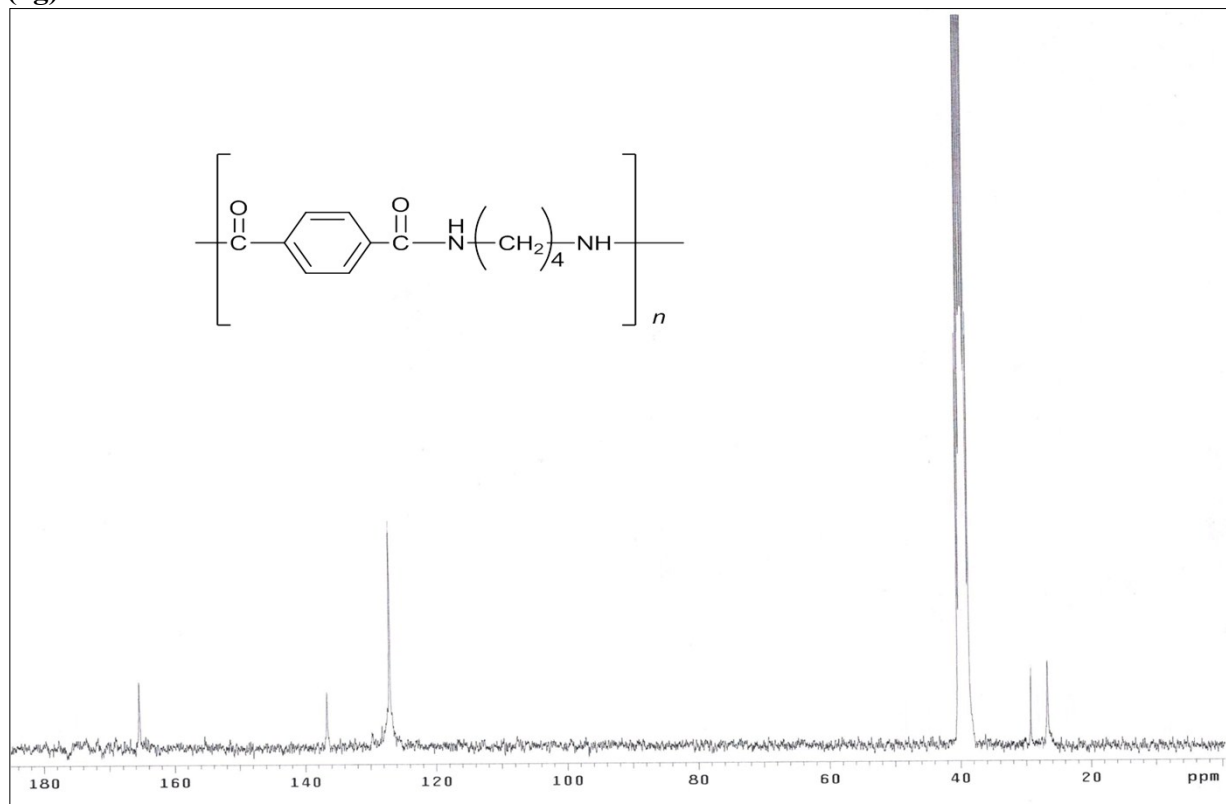

### (3h) FT-IR

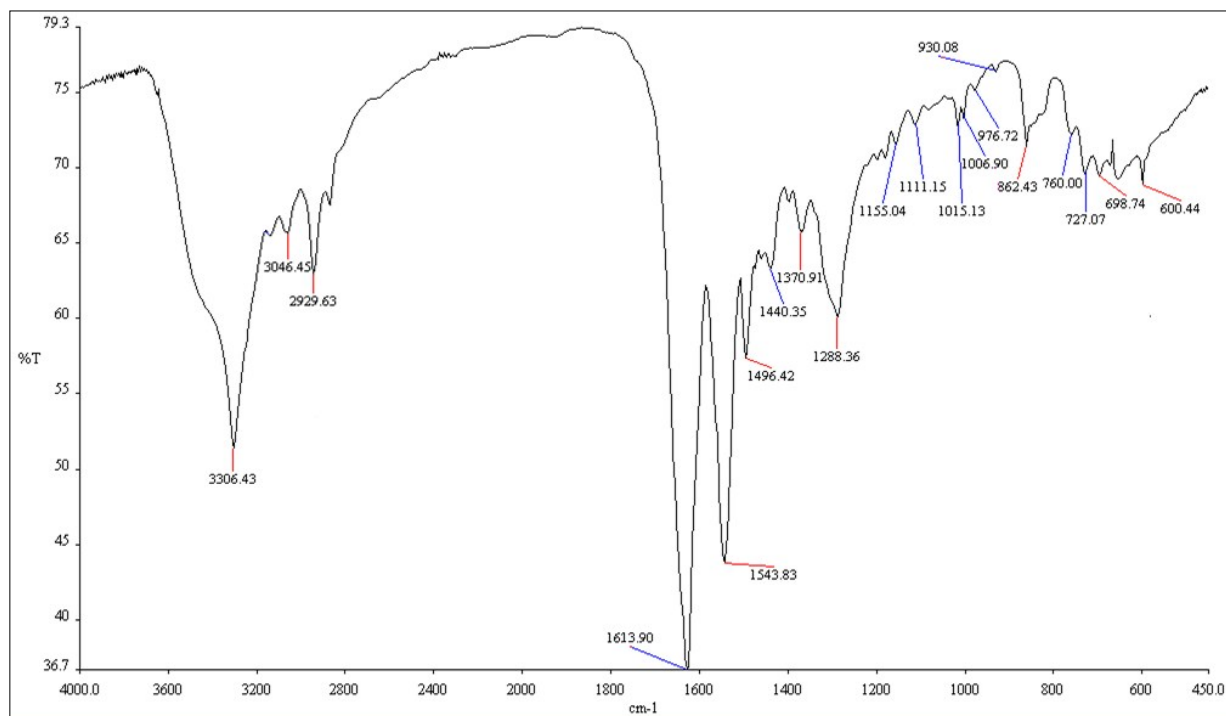

**(3h)  $^1\text{H}$  NMR**

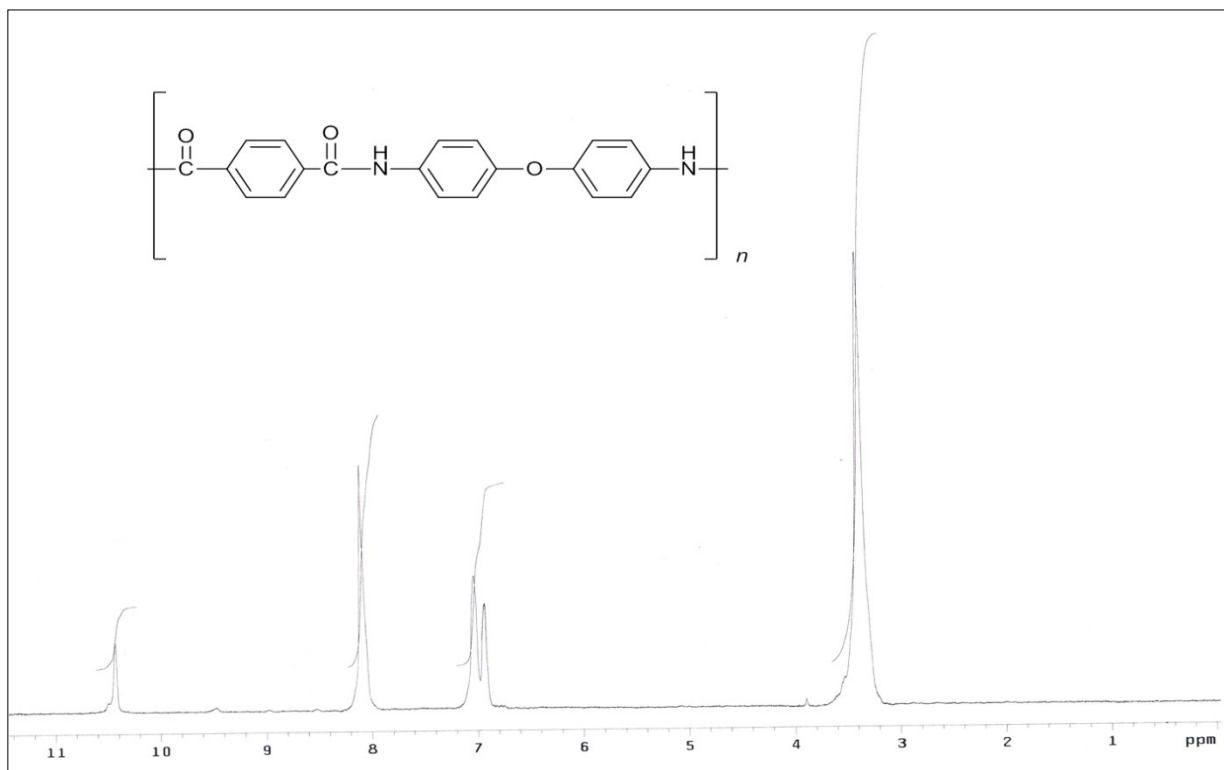

**(3h)  $^{13}\text{C}$  NMR**

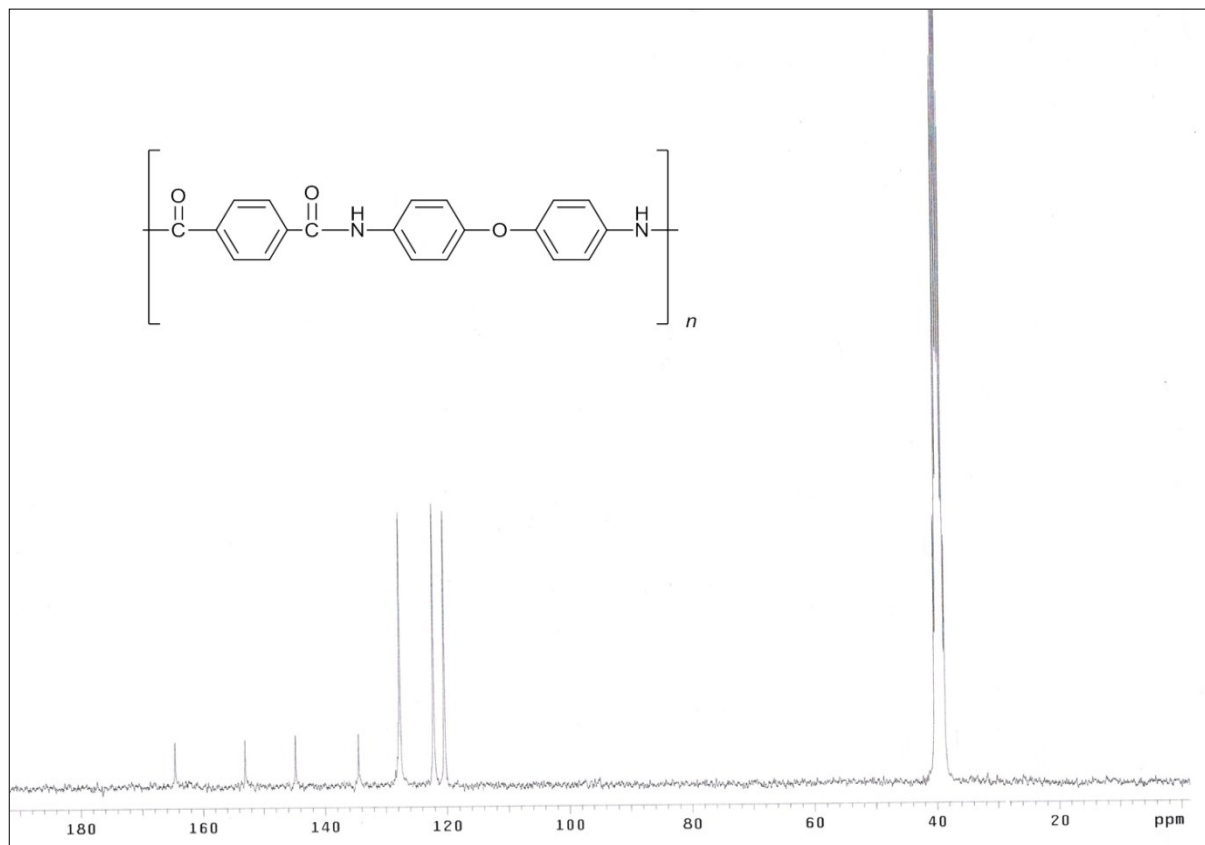

Supplement: c5ra20426g1.pdf [file c5ra20426g1.pdf]
